# Supplementary material for: Single-cell transcriptome analysis revealed a suppressive tumor immune microenvironment in EGFR mutant lung adenocarcinoma
Source: HighWire-hosted journal article supplement (doi:10.1136/jitc-2021-003534), 2022-01-01
Supplement: jitc-2021-003534supp001_data_supplement.pdf [file jitc-2021-003534supp001_data_supplement.pdf]

## Supplementary Table 1. Patient clinical and pathological characteristics and cellular viability.

| ID | Age (year) | Gender | Smoking History | Stage | EGFR Status | PD-L1 expression (TPS) | TMB (mut/MB) | Concomitant mutations           | Cellular Viability (%) |
|----|------------|--------|-----------------|-------|-------------|------------------------|--------------|---------------------------------|------------------------|
| P1 | 60         | Male   | Former          | IIIA  | 19del       | 65%                    | NA           | NA                              | 81.27                  |
| P2 | 57         | Male   | Former          | IVB   | Wild        | 15%                    | 8            | KRAS, PBRM1, TP53, STK11, KEAP1 | 78.1                   |
| P3 | 72         | Female | Never           | IIB   | L858R       | <1%                    | 3.4          | APC, NOTCH2                     | 79.21                  |
| P4 | 72         | Female | Never           | IIB   | 19del       | <1%                    | 5.7          | EGFR T790M, TP53                | 86.91                  |
| P5 | 62         | Male   | Former          | IA3   | Wild        | <1%                    | NA           | NA                              | 90.16                  |
| P6 | 53         | Female | Never           | IA3   | 19del       | <1%                    | NA           | NA                              | 77.93                  |
| P7 | 54         | Male   | Former          | IA3   | Wild        | <1%                    | NA           | NA                              | 91.54                  |
| P8 | 68         | Male   | Former          | IA3   | L858R       | <1%                    | NA           | NA                              | 96.9                   |
| P9 | 58         | Female | Never           | IIA   | Wild        | <1%                    | NA           | NA                              | 97.96                  |

NA: not available. TMB: tumor mutation burden.
